# Supplementary material for: State-Level Prevalence and Associates of Opioid Dependence in the USA
Source: MDPI journal article supplement (doi:10.3390/ijerph19073825), 2022-03-23
Supplement: s1 [file s1]

# Supplementary Material

## State-Level Prevalence and Associates of Opioid Dependence in the USA

Janni Leung\*, Gary C. K. Chan, Samuel X. Tan, Caitlin McClure-Thomas, Louisa

Degenhardt, Wayne Hall (2022).

\* Correspondence: author: National Centre for Youth Substance Use Research, The University of Queensland

**Supplement S1: State-level prevalence of opioids dependence in the past year in**

**National Survey on Drug Use and Health (NSDUH) 2005-2014**

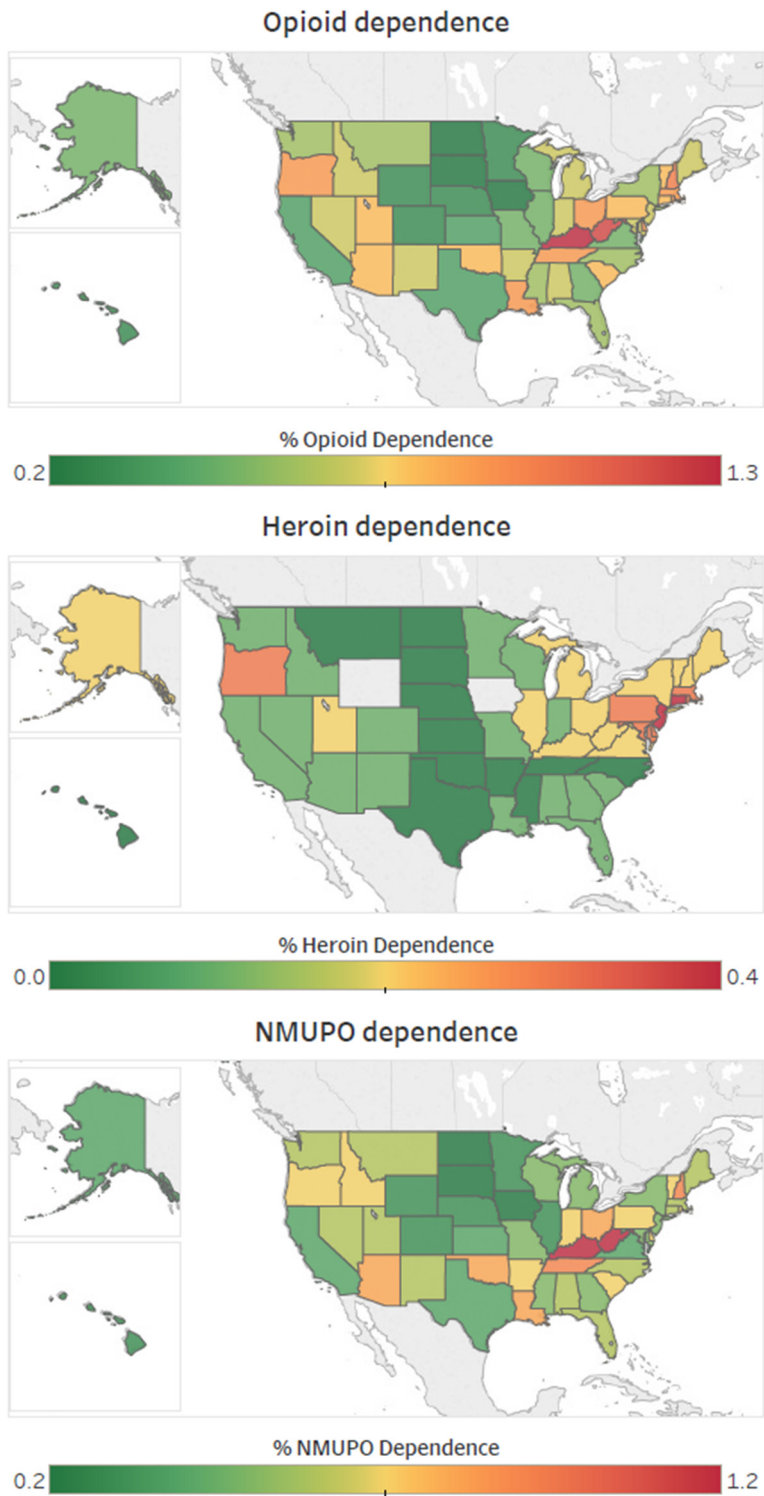

**Figure S1.** State-level prevalence of opioids dependence, heroin dependence, and NMPO dependence.

*Footnote for data tables*

\*Low precision; no estimate reported.

NOTE: Dependence is based on the definition found in the 4th edition of the Diagnostic and Statistical Manual of Mental Disorders (DSM-IV).

*Source: SAMHSA, Center for Behavioral Health Statistics and Quality, National Survey on Drug Use and Health, 2005-2014. Weights were used to account for selection probability, response rate, and demographic representation.*

**Table S1.** State-level prevalence of opioids (heroin or non-medicinal use of prescription opioids [NMPO]) dependence in past year among persons aged 18 or older, by age group and sex: percentages, and 95% confidence intervals, averages based on 2005-2014.

| State                | Past year opioids (heroin or NMPO) dependence % (95%CI) |               |               |               |               |               |
|----------------------|---------------------------------------------------------|---------------|---------------|---------------|---------------|---------------|
|                      | Age groups                                              |               |               | Aged 18+      |               |               |
|                      | Aged 18-25                                              | Aged 26-49    | Aged 50+      | Both sex      | Male          | Female        |
|                      | % (CI)                                                  | % (CI)        | % (CI)        | % (CI)        | % (CI)        | % (CI)        |
| Alabama              | 1.5 (1.0-2.1)                                           | 1.0 (0.6-1.5) | 0.2 (0.0-1.2) | 0.7 (0.5-1.0) | 1.1 (0.7-1.6) | 0.4 (0.2-0.6) |
| Alaska               | 1.4 (1.0-2.0)                                           | 0.4 (0.2-0.8) | 0.1 (0.0-1.0) | 0.5 (0.3-0.7) | 0.6 (0.4-1.1) | 0.4 (0.2-0.6) |
| Arizona              | 1.4 (0.9-2.1)                                           | 0.9 (0.6-1.5) | 0.5 (0.2-1.4) | 0.8 (0.6-1.2) | 1.1 (0.7-1.8) | 0.5 (0.3-0.9) |
| Arkansas             | 1.5 (0.9-2.3)                                           | 0.9 (0.5-1.4) | 0.2 (0.0-1.5) | 0.7 (0.4-1.0) | 0.9 (0.5-1.6) | 0.4 (0.2-0.7) |
| California           | 1.2 (0.9-1.4)                                           | 0.5 (0.4-0.7) | 0.1 (0.0-0.2) | 0.4 (0.4-0.6) | 0.6 (0.4-0.7) | 0.3 (0.3-0.5) |
| Colorado             | 1.2 (0.8-1.9)                                           | 0.3 (0.1-0.8) | * (*-*)       | 0.3 (0.2-0.5) | 0.5 (0.3-0.9) | 0.2 (0.1-0.4) |
| Connecticut          | 2.4 (1.9-3.1)                                           | 0.7 (0.4-1.4) | 0.3 (0.1-1.1) | 0.8 (0.6-1.1) | 1.1 (0.7-1.7) | 0.5 (0.3-0.8) |
| Delaware             | 2.9 (2.2-3.9)                                           | 1.1 (0.6-1.8) | 0.1 (0.0-0.3) | 0.9 (0.6-1.2) | 0.9 (0.6-1.4) | 0.9 (0.6-1.3) |
| District of Columbia | 0.5 (0.3-0.9)                                           | 0.2 (0.1-0.7) | 0.8 (0.3-2.1) | 0.5 (0.3-0.9) | 0.8 (0.4-1.7) | 0.3 (0.1-0.6) |
| Florida              | 1.5 (1.2-1.9)                                           | 0.7 (0.5-0.9) | 0.3 (0.2-0.5) | 0.6 (0.5-0.7) | 0.9 (0.7-1.1) | 0.4 (0.3-0.5) |
| Georgia              | 1.1 (0.7-1.6)                                           | 0.5 (0.2-1.2) | 0.2 (0.1-0.7) | 0.5 (0.3-0.8) | 0.5 (0.3-0.8) | 0.5 (0.2-1.0) |
| Hawaii               | 0.4 (0.2-0.9)                                           | 0.5 (0.2-1.0) | 0.1 (0.0-0.5) | 0.3 (0.2-0.5) | 0.3 (0.1-0.7) | 0.3 (0.1-0.6) |
| Idaho                | 1.7 (1.3-2.2)                                           | 0.9 (0.6-1.5) | 0.2 (0.1-1.0) | 0.7 (0.5-1.1) | 0.4 (0.3-0.7) | 1.0 (0.7-1.6) |
| Illinois             | 0.8 (0.6-1.0)                                           | 0.8 (0.6-1.0) | 0.2 (0.1-0.4) | 0.5 (0.4-0.7) | 0.7 (0.5-0.9) | 0.4 (0.3-0.5) |
| Indiana              | 1.8 (1.3-2.5)                                           | 0.6 (0.3-1.1) | 0.5 (0.2-1.4) | 0.7 (0.5-0.9) | 0.8 (0.5-1.2) | 0.6 (0.4-0.9) |
| Iowa                 | 0.5 (0.3-0.9)                                           | 0.2 (0.1-0.5) | 0.2 (0.0-0.8) | 0.2 (0.1-0.5) | 0.3 (0.1-0.8) | 0.2 (0.1-0.4) |
| Kansas               | 0.7 (0.4-1.2)                                           | 0.5 (0.2-0.9) | 0.2 (0.0-0.7) | 0.4 (0.2-0.6) | 0.4 (0.2-0.7) | 0.4 (0.2-0.8) |
| Kentucky             | 2.8 (2.2-3.6)                                           | 1.9 (1.4-2.5) | 0.2 (0.0-0.8) | 1.3 (1.0-1.6) | 1.5 (1.1-2.1) | 1.0 (0.7-1.5) |
| Louisiana            | 1.4 (1.1-1.9)                                           | 1.3 (0.9-1.8) | 0.2 (0.0-1.6) | 0.9 (0.6-1.2) | 1.1 (0.7-1.7) | 0.7 (0.4-1.0) |
| Maine                | 2.7 (2.1-3.6)                                           | 0.9 (0.5-1.6) | * (*-*)       | 0.7 (0.5-1.0) | 0.8 (0.6-1.1) | 0.6 (0.4-1.0) |
| Maryland             | 1.7 (1.2-2.5)                                           | 0.8 (0.5-1.2) | 0.2 (0.1-0.7) | 0.7 (0.5-0.9) | 1.0 (0.7-1.4) | 0.4 (0.2-0.6) |
| Massachusetts        | 2.0 (1.5-2.8)                                           | 1.0 (0.7-1.6) | 0.4 (0.1-1.3) | 0.9 (0.6-1.3) | 1.4 (0.9-2.1) | 0.5 (0.3-0.7) |
| Michigan             | 1.4 (1.1-1.6)                                           | 0.8 (0.6-1.1) | 0.3 (0.2-0.5) | 0.7 (0.6-0.8) | 0.8 (0.6-1.0) | 0.6 (0.5-0.7) |

| State          | Past year opioids (heroin or NMPO) dependence % (95%CI) |               |               |               |               |               |
|----------------|---------------------------------------------------------|---------------|---------------|---------------|---------------|---------------|
|                | Age groups                                              |               |               | Aged 18+      |               |               |
|                | Aged 18-25                                              | Aged 26-49    | Aged 50+      | Both sex      | Male          | Female        |
|                | % (CI)                                                  | % (CI)        | % (CI)        | % (CI)        | % (CI)        | % (CI)        |
| Minnesota      | 0.7 (0.4-1.0)                                           | 0.4 (0.2-0.8) | 0.1 (0.0-0.7) | 0.3 (0.2-0.5) | 0.5 (0.2-0.9) | 0.2 (0.1-0.4) |
| Mississippi    | 1.5 (1.1-2.0)                                           | 0.6 (0.3-1.1) | 0.2 (0.1-0.8) | 0.6 (0.4-0.8) | 0.7 (0.5-1.0) | 0.5 (0.3-0.9) |
| Missouri       | 1.6 (1.1-2.4)                                           | 0.6 (0.3-1.0) | 0.1 (0.0-0.6) | 0.5 (0.4-0.7) | 0.6 (0.4-0.9) | 0.5 (0.3-0.7) |
| Montana        | 1.5 (1.0-2.2)                                           | 0.9 (0.5-1.5) | * (*-*)       | 0.6 (0.4-0.8) | 0.5 (0.3-0.8) | 0.6 (0.4-1.0) |
| Nebraska       | 0.9 (0.6-1.5)                                           | 0.2 (0.1-0.5) | 0.2 (0.0-1.2) | 0.3 (0.2-0.5) | 0.3 (0.1-0.5) | 0.4 (0.1-0.9) |
| Nevada         | 2.0 (1.3-3.1)                                           | 0.9 (0.5-1.4) | 0.2 (0.0-0.7) | 0.7 (0.5-1.0) | 0.7 (0.5-1.1) | 0.7 (0.5-1.1) |
| New Hampshire  | 2.0 (1.5-2.6)                                           | 1.2 (0.8-1.8) | 0.4 (0.1-1.2) | 1.0 (0.7-1.4) | 1.2 (0.8-1.9) | 0.7 (0.5-1.1) |
| New Jersey     | 1.8 (1.3-2.5)                                           | 0.9 (0.6-1.4) | 0.2 (0.1-0.6) | 0.7 (0.5-1.0) | 0.8 (0.6-1.2) | 0.6 (0.4-0.9) |
| New Mexico     | 1.4 (1.0-2.1)                                           | 0.8 (0.5-1.3) | 0.4 (0.1-1.7) | 0.7 (0.5-1.1) | 1.0 (0.5-1.8) | 0.4 (0.3-0.6) |
| New York       | 1.2 (1.0-1.4)                                           | 0.7 (0.6-0.9) | 0.3 (0.2-0.6) | 0.6 (0.5-0.8) | 0.9 (0.7-1.1) | 0.4 (0.3-0.6) |
| North Carolina | 1.5 (1.2-2.1)                                           | 0.5 (0.3-0.9) | 0.3 (0.1-1.4) | 0.6 (0.3-0.9) | 0.9 (0.5-1.7) | 0.3 (0.2-0.5) |
| North Dakota   | 0.7 (0.4-1.1)                                           | 0.2 (0.1-0.4) | * (*-*)       | 0.2 (0.1-0.3) | 0.2 (0.1-0.3) | 0.2 (0.2-0.4) |
| Ohio           | 1.8 (1.5-2.1)                                           | 1.2 (1.0-1.4) | 0.3 (0.2-0.5) | 0.9 (0.7-1.0) | 0.9 (0.8-1.1) | 0.8 (0.6-1.0) |
| Oklahoma       | 1.3 (0.9-1.9)                                           | 1.1 (0.8-1.6) | 0.4 (0.1-1.8) | 0.8 (0.6-1.2) | 1.1 (0.7-1.7) | 0.6 (0.3-1.2) |
| Oregon         | 1.7 (1.2-2.5)                                           | 1.3 (0.8-2.0) | 0.2 (0.1-1.0) | 0.9 (0.6-1.2) | 1.2 (0.8-1.9) | 0.6 (0.4-0.9) |
| Pennsylvania   | 2.2 (1.8-2.5)                                           | 1.0 (0.8-1.3) | 0.3 (0.1-0.5) | 0.8 (0.7-1.0) | 1.0 (0.8-1.2) | 0.7 (0.5-0.9) |
| Rhode Island   | 1.5 (1.0-2.1)                                           | 1.5 (1.0-2.3) | 0.1 (0.0-0.8) | 0.9 (0.7-1.3) | 1.2 (0.7-1.8) | 0.7 (0.5-1.0) |
| South Carolina | 1.3 (0.8-1.9)                                           | 0.9 (0.6-1.5) | 0.4 (0.1-1.3) | 0.8 (0.5-1.1) | 0.9 (0.5-1.5) | 0.7 (0.4-1.2) |
| South Dakota   | 0.6 (0.3-1.2)                                           | 0.1 (0.0-0.6) | 0.1 (0.0-0.8) | 0.2 (0.1-0.4) | 0.1 (0.0-0.4) | 0.2 (0.1-0.6) |
| Tennessee      | 2.4 (1.8-3.2)                                           | 1.0 (0.6-1.5) | 0.3 (0.1-0.8) | 0.9 (0.6-1.2) | 1.1 (0.8-1.5) | 0.7 (0.4-1.1) |
| Texas          | 0.8 (0.7-1.0)                                           | 0.5 (0.3-0.6) | 0.1 (0.1-0.3) | 0.4 (0.3-0.5) | 0.4 (0.3-0.5) | 0.4 (0.3-0.5) |
| Utah           | 1.7 (1.2-2.5)                                           | 0.8 (0.5-1.4) | 0.1 (0.0-0.4) | 0.8 (0.5-1.0) | 0.8 (0.5-1.2) | 0.8 (0.5-1.2) |
| Vermont        | 2.4 (1.8-3.1)                                           | 0.9 (0.6-1.4) | 0.1 (0.0-0.6) | 0.8 (0.6-1.0) | 0.9 (0.6-1.3) | 0.7 (0.4-1.1) |
| Virginia       | 1.2 (0.8-1.7)                                           | 0.5 (0.3-1.0) | 0.1 (0.0-0.8) | 0.5 (0.3-0.7) | 0.4 (0.2-0.8) | 0.5 (0.2-0.9) |
| Washington     | 1.2 (0.9-1.7)                                           | 0.9 (0.6-1.5) | 0.1 (0.0-0.4) | 0.6 (0.4-0.9) | 0.7 (0.4-1.2) | 0.5 (0.4-0.8) |
| West Virginia  | 3.6 (2.9-4.4)                                           | 1.4 (0.9-2.1) | 0.4 (0.1-1.0) | 1.2 (0.9-1.5) | 1.4 (1.0-1.9) | 1.0 (0.7-1.5) |
| Wisconsin      | 1.3 (0.8-1.9)                                           | 0.5 (0.3-0.8) | 0.3 (0.1-1.2) | 0.5 (0.3-0.7) | 0.4 (0.3-0.7) | 0.5 (0.3-1.1) |
| Wyoming        | 0.9 (0.6-1.3)                                           | 0.4 (0.2-0.8) | 0.1 (0.0-0.9) | 0.3 (0.2-0.5) | 0.4 (0.2-0.7) | 0.3 (0.1-0.7) |

**Table S2.** State-level prevalence of past year heroin dependence among persons aged 18 or older, by age group and sex: averages based on 2005-2014.

| State                   | Past year heroin dependence % (95%CI) |               |               |               |               |               |
|-------------------------|---------------------------------------|---------------|---------------|---------------|---------------|---------------|
|                         | Age groups                            |               |               | Aged 18+      |               |               |
|                         | Aged 18-25                            | Aged 26-49    | Aged 50+      | Both sex      | Male          | Female        |
|                         | % (CI)                                | % (CI)        | % (CI)        | % (CI)        | % (CI)        | % (CI)        |
| Alabama                 | 0.2 (0.1-0.5)                         | 0.2 (0.0-0.5) | * (*-*)       | 0.1 (0.0-0.2) | 0.2 (0.1-0.5) | 0.0 (0.0-0.1) |
| Alaska                  | 0.8 (0.5-1.3)                         | 0.1 (0.0-0.5) | * (*-*)       | 0.2 (0.1-0.3) | 0.3 (0.2-0.6) | 0.1 (0.0-0.2) |
| Arizona                 | 0.3 (0.2-0.6)                         | 0.1 (0.0-0.3) | * (*-*)       | 0.1 (0.1-0.2) | 0.1 (0.0-0.2) | 0.1 (0.0-0.3) |
| Arkansas                | 0.1 (0.0-0.3)                         | * (*-*)       | * (*-*)       | 0.0 (0.0-0.0) | 0.0 (0.0-0.1) | 0.0 (0.0-0.1) |
| California              | 0.2 (0.1-0.4)                         | 0.1 (0.1-0.3) | 0.0 (0.0-0.2) | 0.1 (0.1-0.2) | 0.2 (0.1-0.3) | 0.1 (0.0-0.1) |
| Colorado                | 0.4 (0.2-0.9)                         | * (*-*)       | * (*-*)       | 0.1 (0.0-0.1) | 0.1 (0.0-0.2) | 0.0 (0.0-0.1) |
| Connecticut             | 1.2 (0.7-1.9)                         | 0.3 (0.1-0.8) | 0.2 (0.0-0.9) | 0.4 (0.2-0.6) | 0.6 (0.3-1.0) | 0.2 (0.1-0.4) |
| Delaware                | 0.9 (0.5-1.5)                         | 0.5 (0.2-1.0) | 0.0 (0.0-0.1) | 0.3 (0.2-0.6) | 0.4 (0.2-0.8) | 0.3 (0.2-0.6) |
| District of<br>Columbia | 0.0 (0.0-0.2)                         | 0.2 (0.1-0.7) | 0.7 (0.2-2.0) | 0.4 (0.2-0.8) | 0.7 (0.3-1.6) | 0.1 (0.0-0.3) |
| Florida                 | 0.2 (0.1-0.4)                         | 0.1 (0.0-0.2) | 0.1 (0.0-0.2) | 0.1 (0.1-0.2) | 0.2 (0.1-0.3) | 0.0 (0.0-0.1) |
| Georgia                 | 0.3 (0.1-0.6)                         | 0.1 (0.0-0.4) | 0.1 (0.0-0.6) | 0.1 (0.1-0.3) | 0.2 (0.1-0.5) | 0.0 (0.0-0.1) |
| Hawaii                  | 0.1 (0.0-0.4)                         | * (*-*)       | * (*-*)       | 0.0 (0.0-0.1) | 0.0 (0.0-0.1) | * (*-*)       |
| Idaho                   | 0.0 (0.0-0.3)                         | 0.2 (0.1-0.5) | * (*-*)       | 0.1 (0.0-0.2) | 0.1 (0.0-0.3) | 0.1 (0.0-0.3) |
| Illinois                | 0.2 (0.2-0.4)                         | 0.3 (0.2-0.5) | 0.1 (0.0-0.3) | 0.2 (0.2-0.3) | 0.3 (0.2-0.5) | 0.1 (0.1-0.2) |
| Indiana                 | 0.4 (0.2-0.8)                         | 0.1 (0.0-0.5) | * (*-*)       | 0.1 (0.1-0.2) | 0.2 (0.1-0.4) | 0.1 (0.0-0.2) |
| Iowa                    | * (*-*)                               | * (*-*)       | * (*-*)       | * (*-*)       | * (*-*)       | * (*-*)       |
| Kansas                  | 0.1 (0.0-0.4)                         | * (*-*)       | * (*-*)       | 0.0 (0.0-0.1) | 0.0 (0.0-0.1) | * (*-*)       |
| Kentucky                | 0.5 (0.2-1.0)                         | 0.2 (0.1-0.5) | * (*-*)       | 0.2 (0.1-0.3) | 0.1 (0.1-0.3) | 0.2 (0.1-0.4) |
| Louisiana               | 0.1 (0.0-0.3)                         | 0.3 (0.1-0.7) | * (*-*)       | 0.1 (0.0-0.3) | 0.1 (0.0-0.5) | 0.1 (0.0-0.4) |
| Maine                   | 1.0 (0.6-1.6)                         | 0.1 (0.0-0.4) | * (*-*)       | 0.2 (0.1-0.3) | 0.2 (0.1-0.4) | 0.1 (0.1-0.2) |
| Maryland                | 0.6 (0.3-1.0)                         | 0.3 (0.2-0.7) | 0.0 (0.0-0.3) | 0.3 (0.2-0.4) | 0.4 (0.2-0.7) | 0.1 (0.1-0.3) |
| Massachusetts           | 0.4 (0.2-0.8)                         | 0.4 (0.2-0.7) | 0.3 (0.1-1.3) | 0.3 (0.2-0.6) | 0.5 (0.2-1.1) | 0.2 (0.1-0.5) |
| Michigan                | 0.3 (0.3-0.5)                         | 0.2 (0.1-0.4) | 0.1 (0.0-0.3) | 0.2 (0.1-0.3) | 0.2 (0.1-0.4) | 0.2 (0.1-0.3) |
| Minnesota               | 0.1 (0.0-0.3)                         | * (*-*)       | 0.1 (0.0-0.7) | 0.1 (0.0-0.2) | 0.1 (0.0-0.5) | * (*-*)       |

| State          | Past year heroin dependence % (95%CI) |               |               |               |               |               |
|----------------|---------------------------------------|---------------|---------------|---------------|---------------|---------------|
|                | Age groups                            |               |               | Aged 18+      |               |               |
|                | Aged 18-25                            | Aged 26-49    | Aged 50+      | Both sex      | Male          | Female        |
|                | % (CI)                                | % (CI)        | % (CI)        | % (CI)        | % (CI)        | % (CI)        |
| Mississippi    | 0.2 (0.1-0.6)                         | 0.0 (0.0-0.3) | * (*-*)       | 0.0 (0.0-0.1) | 0.1 (0.0-0.2) | 0.0 (0.0-0.2) |
| Missouri       | 0.4 (0.2-0.7)                         | 0.1 (0.0-0.4) | * (*-*)       | 0.1 (0.0-0.2) | 0.1 (0.0-0.3) | 0.1 (0.0-0.3) |
| Montana        | 0.1 (0.0-0.2)                         | * (*-*)       | * (*-*)       | 0.0 (0.0-0.0) | 0.0 (0.0-0.1) | 0.0 (0.0-0.0) |
| Nebraska       | 0.2 (0.0-0.9)                         | * (*-*)       | * (*-*)       | 0.0 (0.0-0.1) | 0.0 (0.0-0.1) | 0.0 (0.0-0.3) |
| Nevada         | 0.5 (0.2-1.7)                         | 0.1 (0.0-0.7) | * (*-*)       | 0.1 (0.1-0.4) | 0.1 (0.0-0.5) | 0.2 (0.0-0.6) |
| New Hampshire  | 0.6 (0.4-1.1)                         | 0.4 (0.2-0.8) | * (*-*)       | 0.2 (0.1-0.4) | 0.3 (0.1-0.5) | 0.2 (0.1-0.5) |
| New Jersey     | 1.0 (0.7-1.3)                         | 0.5 (0.3-0.9) | 0.1 (0.0-0.5) | 0.4 (0.3-0.6) | 0.4 (0.3-0.7) | 0.3 (0.2-0.6) |
| New Mexico     | 0.5 (0.3-0.9)                         | 0.2 (0.1-0.5) | * (*-*)       | 0.1 (0.1-0.2) | 0.1 (0.1-0.3) | 0.2 (0.1-0.4) |
| New York       | 0.3 (0.2-0.4)                         | 0.2 (0.1-0.4) | 0.2 (0.1-0.4) | 0.2 (0.1-0.3) | 0.3 (0.2-0.5) | 0.1 (0.1-0.2) |
| North Carolina | 0.1 (0.1-0.3)                         | 0.1 (0.0-0.5) | * (*-*)       | 0.0 (0.0-0.2) | 0.1 (0.0-0.3) | 0.0 (0.0-0.0) |
| North Dakota   | 0.0 (0.0-0.2)                         | * (*-*)       | * (*-*)       | 0.0 (0.0-0.0) | 0.0 (0.0-0.1) | * (*-*)       |
| Ohio           | 0.4 (0.3-0.6)                         | 0.3 (0.2-0.4) | * (*-*)       | 0.2 (0.1-0.2) | 0.2 (0.1-0.3) | 0.2 (0.1-0.2) |
| Oklahoma       | 0.0 (0.0-0.2)                         | 0.1 (0.0-0.4) | * (*-*)       | 0.0 (0.0-0.2) | 0.0 (0.0-0.4) | 0.0 (0.0-0.1) |
| Oregon         | 0.4 (0.2-1.1)                         | 0.5 (0.2-1.1) | * (*-*)       | 0.3 (0.1-0.5) | 0.4 (0.2-0.9) | 0.2 (0.1-0.3) |
| Pennsylvania   | 0.9 (0.7-1.1)                         | 0.4 (0.2-0.6) | 0.1 (0.0-0.2) | 0.3 (0.2-0.4) | 0.4 (0.3-0.6) | 0.2 (0.2-0.3) |
| Rhode Island   | 0.3 (0.1-0.7)                         | 0.5 (0.2-1.2) | 0.0 (0.0-0.1) | 0.3 (0.1-0.5) | 0.4 (0.2-1.0) | 0.1 (0.0-0.2) |
| South Carolina | 0.2 (0.1-0.6)                         | 0.2 (0.1-0.6) | * (*-*)       | 0.1 (0.0-0.3) | 0.2 (0.1-0.5) | 0.0 (0.0-0.1) |
| South Dakota   | 0.1 (0.0-0.5)                         | * (*-*)       | * (*-*)       | 0.0 (0.0-0.1) | * (*-*)       | 0.0 (0.0-0.2) |
| Tennessee      | 0.1 (0.0-0.2)                         | 0.0 (0.0-0.3) | * (*-*)       | 0.0 (0.0-0.1) | 0.1 (0.0-0.1) | * (*-*)       |
| Texas          | 0.1 (0.1-0.2)                         | 0.0 (0.0-0.1) | * (*-*)       | 0.0 (0.0-0.1) | 0.0 (0.0-0.1) | 0.0 (0.0-0.0) |
| Utah           | 0.8 (0.4-1.4)                         | 0.1 (0.0-0.3) | * (*-*)       | 0.2 (0.1-0.3) | 0.2 (0.1-0.4) | 0.2 (0.1-0.4) |
| Vermont        | 0.4 (0.2-0.8)                         | 0.2 (0.1-0.5) | * (*-*)       | 0.2 (0.1-0.3) | 0.2 (0.1-0.4) | 0.1 (0.1-0.3) |
| Virginia       | 0.3 (0.2-0.7)                         | 0.3 (0.1-0.6) | * (*-*)       | 0.2 (0.1-0.3) | 0.2 (0.1-0.4) | 0.1 (0.0-0.5) |
| Washington     | 0.2 (0.1-0.5)                         | 0.2 (0.1-0.5) | 0.1 (0.0-0.4) | 0.1 (0.1-0.3) | 0.3 (0.1-0.6) | 0.0 (0.0-0.1) |
| West Virginia  | 0.8 (0.5-1.2)                         | 0.1 (0.0-0.5) | 0.0 (0.0-0.3) | 0.2 (0.1-0.3) | 0.1 (0.1-0.3) | 0.2 (0.1-0.4) |
| Wisconsin      | 0.3 (0.2-0.8)                         | 0.0 (0.0-0.2) | * (*-*)       | 0.1 (0.0-0.1) | 0.1 (0.0-0.2) | 0.0 (0.0-0.1) |
| Wyoming        | 0.0 (0.0-0.2)                         | * (*-*)       | * (*-*)       | * (*-*)       | 0.0 (0.0-0.1) | * (*-*)       |

**Table S3.** Prevalence of non-medical prescription opioid (NMPO) dependence in past year among persons aged 18 or older, by age group and sex: averages based on 2005-2014.

| State                | Past year NMPO dependence % (95%CI) |               |               |               |               |               |
|----------------------|-------------------------------------|---------------|---------------|---------------|---------------|---------------|
|                      | Age groups                          |               |               | Aged 18+      |               |               |
|                      | Aged 18-25                          | Aged 26-49    | Aged 50+      | Both sex      | Male          | Female        |
|                      | % (CI)                              | % (CI)        | % (CI)        | % (CI)        | % (CI)        | % (CI)        |
| Alabama              | 1.4 (0.9-2.0)                       | 0.9 (0.5-1.4) | 0.2 (0.0-1.2) | 0.6 (0.4-0.9) | 0.9 (0.6-1.5) | 0.4 (0.2-0.6) |
| Alaska               | 1.1 (0.7-1.7)                       | 0.4 (0.2-0.7) | 0.1 (0.0-1.0) | 0.4 (0.3-0.6) | 0.5 (0.3-0.9) | 0.3 (0.2-0.5) |
| Arizona              | 1.2 (0.7-1.9)                       | 0.9 (0.5-1.4) | 0.5 (0.2-1.4) | 0.8 (0.5-1.1) | 1.1 (0.7-1.7) | 0.5 (0.3-0.8) |
| Arkansas             | 1.4 (0.9-2.2)                       | 0.9 (0.5-1.4) | 0.2 (0.0-1.5) | 0.7 (0.4-1.0) | 0.9 (0.5-1.6) | 0.4 (0.2-0.7) |
| California           | 1.0 (0.8-1.3)                       | 0.4 (0.3-0.6) | 0.0 (0.0-0.1) | 0.4 (0.3-0.5) | 0.5 (0.3-0.6) | 0.3 (0.2-0.4) |
| Colorado             | 1.0 (0.6-1.5)                       | 0.3 (0.1-0.8) | * (*-*)       | 0.3 (0.2-0.5) | 0.4 (0.2-0.8) | 0.2 (0.1-0.4) |
| Connecticut          | 1.6 (1.1-2.4)                       | 0.5 (0.3-1.1) | 0.3 (0.1-1.1) | 0.6 (0.4-0.9) | 0.8 (0.4-1.5) | 0.4 (0.2-0.6) |
| Delaware             | 2.5 (1.8-3.4)                       | 0.7 (0.4-1.4) | 0.1 (0.0-0.4) | 0.7 (0.5-1.0) | 0.6 (0.4-0.9) | 0.8 (0.5-1.2) |
| District of Columbia | 0.5 (0.3-0.9)                       | * (*-*)       | 0.3 (0.1-1.0) | 0.2 (0.1-0.4) | 0.2 (0.1-0.5) | 0.2 (0.0-0.5) |
| Florida              | 1.5 (1.2-1.8)                       | 0.7 (0.5-0.9) | 0.2 (0.1-0.5) | 0.6 (0.5-0.7) | 0.8 (0.6-1.1) | 0.3 (0.3-0.4) |
| Georgia              | 0.9 (0.6-1.4)                       | 0.5 (0.2-1.1) | 0.2 (0.1-0.7) | 0.5 (0.3-0.7) | 0.5 (0.3-0.8) | 0.5 (0.2-1.0) |
| Hawaii               | 0.4 (0.2-0.8)                       | 0.5 (0.2-1.0) | 0.1 (0.0-0.5) | 0.3 (0.2-0.5) | 0.3 (0.1-0.7) | 0.3 (0.1-0.6) |
| Idaho                | 1.7 (1.3-2.2)                       | 0.9 (0.5-1.4) | 0.2 (0.1-1.0) | 0.7 (0.5-1.0) | 0.4 (0.3-0.7) | 1.0 (0.6-1.6) |
| Illinois             | 0.7 (0.5-0.9)                       | 0.4 (0.3-0.6) | 0.1 (0.0-0.3) | 0.3 (0.3-0.4) | 0.4 (0.3-0.6) | 0.3 (0.2-0.4) |
| Indiana              | 1.5 (1.1-2.1)                       | 0.5 (0.3-1.0) | 0.5 (0.2-1.4) | 0.7 (0.5-0.9) | 0.7 (0.5-1.1) | 0.6 (0.4-0.9) |
| Iowa                 | 0.5 (0.3-0.9)                       | 0.2 (0.1-0.5) | 0.2 (0.0-0.8) | 0.2 (0.1-0.5) | 0.3 (0.1-0.8) | 0.2 (0.1-0.4) |
| Kansas               | 0.7 (0.4-1.2)                       | 0.5 (0.2-0.9) | 0.2 (0.0-0.7) | 0.4 (0.2-0.6) | 0.3 (0.2-0.7) | 0.4 (0.2-0.8) |
| Kentucky             | 2.5 (1.9-3.2)                       | 1.8 (1.3-2.5) | 0.2 (0.0-0.8) | 1.2 (0.9-1.6) | 1.5 (1.1-2.0) | 0.9 (0.6-1.4) |
| Louisiana            | 1.4 (1.1-1.9)                       | 1.2 (0.9-1.7) | 0.2 (0.0-1.6) | 0.8 (0.6-1.1) | 1.0 (0.7-1.6) | 0.7 (0.4-1.0) |
| Maine                | 2.4 (1.9-3.2)                       | 0.8 (0.5-1.5) | * (*-*)       | 0.6 (0.5-0.9) | 0.7 (0.5-1.0) | 0.6 (0.3-0.9) |
| Maryland             | 1.5 (1.0-2.1)                       | 0.5 (0.3-0.9) | 0.2 (0.0-0.7) | 0.5 (0.4-0.7) | 0.8 (0.5-1.1) | 0.3 (0.2-0.5) |
| Massachusetts        | 1.8 (1.3-2.4)                       | 0.7 (0.4-1.2) | 0.2 (0.0-0.7) | 0.6 (0.5-0.9) | 1.0 (0.7-1.5) | 0.3 (0.2-0.5) |
| Michigan             | 1.1 (0.9-1.4)                       | 0.7 (0.5-0.9) | 0.2 (0.1-0.4) | 0.5 (0.4-0.6) | 0.6 (0.5-0.8) | 0.5 (0.3-0.6) |
| Minnesota            | 0.6 (0.3-0.9)                       | 0.4 (0.2-0.8) | 0.1 (0.0-0.4) | 0.3 (0.2-0.4) | 0.3 (0.2-0.7) | 0.2 (0.1-0.4) |



| State          | Past year NMPO dependence % (95%CI) |               |               |               |               |               |
|----------------|-------------------------------------|---------------|---------------|---------------|---------------|---------------|
|                | Age groups                          |               |               | Aged 18+      |               |               |
|                | Aged 18-25                          | Aged 26-49    | Aged 50+      | Both sex      | Male          | Female        |
|                | % (CI)                              | % (CI)        | % (CI)        | % (CI)        | % (CI)        | % (CI)        |
| Mississippi    | 1.3 (1.0-1.8)                       | 0.6 (0.3-1.1) | 0.2 (0.1-0.8) | 0.5 (0.4-0.8) | 0.6 (0.4-0.9) | 0.5 (0.3-0.9) |
| Missouri       | 1.3 (0.8-2.1)                       | 0.6 (0.3-1.0) | 0.1 (0.0-0.6) | 0.5 (0.3-0.7) | 0.5 (0.3-0.9) | 0.4 (0.2-0.7) |
| Montana        | 1.5 (1.0-2.2)                       | 0.9 (0.5-1.5) | * (*-*)       | 0.6 (0.4-0.8) | 0.5 (0.3-0.8) | 0.6 (0.3-1.0) |
| Nebraska       | 0.9 (0.5-1.4)                       | 0.2 (0.1-0.5) | 0.2 (0.0-1.2) | 0.3 (0.2-0.5) | 0.2 (0.1-0.5) | 0.4 (0.1-0.9) |
| Nevada         | 1.8 (1.2-2.8)                       | 0.7 (0.4-1.2) | 0.2 (0.0-0.7) | 0.6 (0.5-0.9) | 0.7 (0.5-1.1) | 0.6 (0.4-0.9) |
| New Hampshire  | 1.8 (1.3-2.4)                       | 1.2 (0.8-1.8) | 0.4 (0.1-1.2) | 0.9 (0.6-1.3) | 1.1 (0.7-1.8) | 0.7 (0.4-1.1) |
| New Jersey     | 1.2 (0.7-2.2)                       | 0.5 (0.3-0.9) | 0.2 (0.1-0.6) | 0.5 (0.3-0.7) | 0.6 (0.4-1.0) | 0.3 (0.2-0.5) |
| New Mexico     | 1.1 (0.7-1.8)                       | 0.6 (0.4-1.0) | 0.4 (0.1-1.7) | 0.6 (0.3-1.0) | 0.9 (0.4-1.7) | 0.3 (0.2-0.4) |
| New York       | 1.0 (0.8-1.2)                       | 0.6 (0.5-0.8) | 0.2 (0.1-0.4) | 0.5 (0.4-0.6) | 0.7 (0.5-0.8) | 0.3 (0.2-0.4) |
| North Carolina | 1.5 (1.1-2.0)                       | 0.5 (0.3-0.9) | 0.3 (0.1-1.4) | 0.6 (0.3-0.9) | 0.9 (0.4-1.7) | 0.3 (0.2-0.4) |
| North Dakota   | 0.7 (0.4-1.1)                       | 0.2 (0.1-0.4) | * (*-*)       | 0.2 (0.1-0.3) | 0.1 (0.1-0.4) | 0.2 (0.2-0.4) |
| Ohio           | 1.6 (1.3-1.9)                       | 1.0 (0.8-1.2) | 0.3 (0.2-0.5) | 0.8 (0.7-0.9) | 0.8 (0.7-1.0) | 0.7 (0.6-0.9) |
| Oklahoma       | 1.3 (0.9-1.9)                       | 1.1 (0.8-1.6) | 0.4 (0.1-1.8) | 0.8 (0.6-1.2) | 1.1 (0.7-1.7) | 0.6 (0.3-1.2) |
| Oregon         | 1.4 (0.9-2.0)                       | 0.9 (0.5-1.5) | 0.2 (0.1-1.0) | 0.7 (0.5-1.0) | 1.0 (0.6-1.6) | 0.4 (0.2-0.7) |
| Pennsylvania   | 1.6 (1.3-1.9)                       | 0.9 (0.7-1.1) | 0.2 (0.1-0.4) | 0.7 (0.6-0.8) | 0.8 (0.6-1.0) | 0.5 (0.4-0.7) |
| Rhode Island   | 1.3 (0.9-2.0)                       | 1.1 (0.8-1.6) | 0.1 (0.0-0.8) | 0.7 (0.5-1.0) | 0.8 (0.5-1.3) | 0.7 (0.5-0.9) |
| South Carolina | 1.2 (0.8-1.9)                       | 0.8 (0.5-1.4) | 0.4 (0.1-1.3) | 0.7 (0.5-1.1) | 0.8 (0.4-1.4) | 0.6 (0.4-1.1) |
| South Dakota   | 0.6 (0.3-1.2)                       | 0.1 (0.0-0.6) | 0.1 (0.0-0.8) | 0.2 (0.1-0.4) | 0.1 (0.0-0.4) | 0.2 (0.1-0.6) |
| Tennessee      | 2.4 (1.8-3.2)                       | 1.0 (0.6-1.5) | 0.3 (0.1-0.8) | 0.9 (0.6-1.2) | 1.1 (0.8-1.5) | 0.7 (0.4-1.1) |
| Texas          | 0.8 (0.6-1.0)                       | 0.4 (0.3-0.6) | 0.1 (0.1-0.3) | 0.4 (0.3-0.5) | 0.4 (0.3-0.5) | 0.4 (0.3-0.5) |
| Utah           | 1.2 (0.8-1.8)                       | 0.8 (0.5-1.3) | 0.1 (0.0-0.4) | 0.6 (0.5-0.9) | 0.6 (0.4-1.1) | 0.6 (0.4-1.0) |
| Vermont        | 2.1 (1.6-2.7)                       | 0.8 (0.6-1.3) | 0.1 (0.0-0.6) | 0.7 (0.5-0.9) | 0.8 (0.5-1.1) | 0.6 (0.4-1.0) |
| Virginia       | 1.0 (0.7-1.5)                       | 0.4 (0.2-0.7) | 0.1 (0.0-0.8) | 0.4 (0.2-0.6) | 0.3 (0.2-0.5) | 0.4 (0.2-0.8) |
| Washington     | 1.1 (0.8-1.6)                       | 0.9 (0.5-1.5) | 0.1 (0.0-0.4) | 0.6 (0.4-0.9) | 0.7 (0.4-1.1) | 0.5 (0.3-0.8) |
| West Virginia  | 3.3 (2.7-4.1)                       | 1.4 (0.9-2.1) | 0.4 (0.1-1.0) | 1.2 (0.9-1.5) | 1.3 (0.9-1.8) | 1.0 (0.7-1.5) |
| Wisconsin      | 1.2 (0.8-1.8)                       | 0.5 (0.3-0.8) | 0.3 (0.1-1.2) | 0.5 (0.3-0.7) | 0.4 (0.3-0.7) | 0.5 (0.3-1.1) |
| Wyoming        | 0.9 (0.6-1.3)                       | 0.4 (0.2-0.8) | 0.1 (0.0-0.9) | 0.3 (0.2-0.5) | 0.4 (0.2-0.7) | 0.3 (0.1-0.7) |

## Supplement S2: Descriptive statistics across states

**Table S4.** Descriptive statistics across states for opioids variables.

|                     | Mean | SD  | Median | Range | Min  | Max  |
|---------------------|------|-----|--------|-------|------|------|
| Opioid death rates* | 10.4 | 5.7 | 9.3    | 28.4  | 3.2  | 31.6 |
|                     |      |     |        |       |      |      |
| Opioid dependence   | 0.6  | 0.2 | 0.7    | 1.1   | 0.2  | 1.3  |
| Heroin dependence   | 0.1  | 0.1 | 0.1    | 0.4   | <0.1 | 0.4  |
| NMPO dependence     | 0.6  | 0.2 | 0.6    | 1.0   | 0.2  | 1.2  |

\* per 100,000

**Table S5.** Descriptive statistics across states for socio-demographic factors.

|                                     | Mean   | SD     | Median | Range   | Min    | Max     |
|-------------------------------------|--------|--------|--------|---------|--------|---------|
| GDP/capita <sup>a</sup>             | 49,168 | 18,564 | 46,458 | 133,140 | 31,741 | 164,881 |
| Mean personal income <sup>b</sup>   | 40,708 | 6,869  | 39,384 | 31,707  | 30,678 | 62,384  |
| High school completion <sup>c</sup> | 87.9   | 3.1    | 88.8   | 10.9    | 81.5   | 92.4    |
| Rurality <sup>d</sup>               | 0.3    | 0.2    | 0.3    | 0.8     | 0.0    | 0.8     |
| Unemployment rate <sup>e</sup>      | 6.4    | 1.3    | 6.5    | 5.8     | 3.3    | 9.1     |

<sup>a</sup> Average GDP/capita over 2005-2014; <sup>b</sup> Average mean personal income over 2005-2014; <sup>c</sup> Average % of residents who completed high school over 2005-2014; <sup>d</sup> % rural in 2010; (rural defined as city/town with <2,500 pop); <sup>e</sup> Average unemployment rate over 2005-2014; <sup>f</sup> Pooled prevalence of dependence across 2005-2014 of each state; NMPO: non-medical prescription opioids.
